# Supplementary material for: A DNA origami-based device for investigating DNA bending proteins by transmission electron microscopy
Source: Royal Society of Chemistry journal article supplement (doi:10.1039/d2nr05366g), 2023-01-01
Supplement: d2nr05366g1.pdf [file d2nr05366g1.pdf]

# A DNA origami-based device for investigating DNA bending proteins by transmission electron microscopy

*Ashwin Karthick Natarajan\*†, Joonas Ryssy‡ and Anton Kuzyk\**

Department of Neuroscience and Biomedical Engineering, Aalto University School of Science, P.O.  
Box 12200, FI-00076 Aalto, Finland.

† Present address: Max-Delbrück-Center for Molecular Medicine in the Helmholtz Association,  
Structural Biology, Robert-Rössle-Straße 10, Berlin, Germany.

‡ Present address: Department of Chemistry, KTH Royal Institute of Technology, Teknikringen 30,  
10044 Stockholm, Sweden.

\* Corresponding authors E-mail: ashwin.natarajan@aalto.fi, anton.kuzyk@aalto.fi

## Supplementary Information

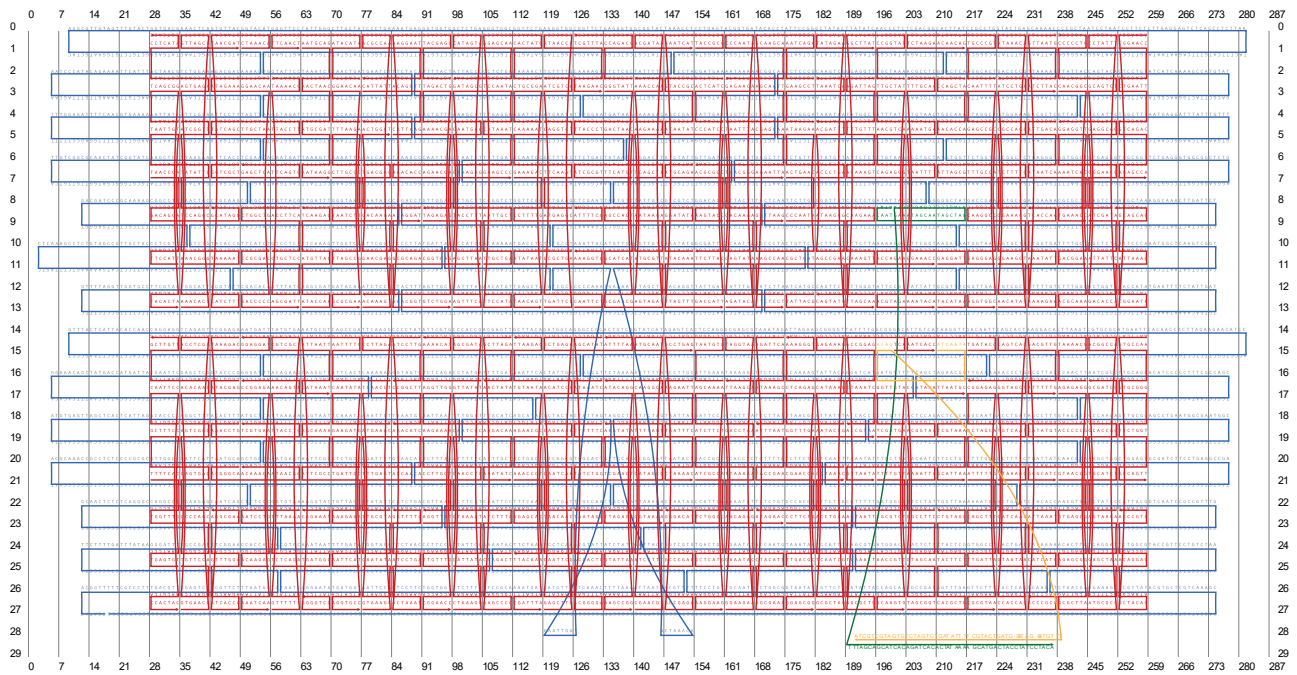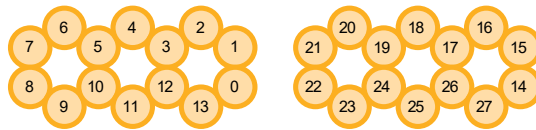

**Figure S1.** caDNAno design and illustration of the DNA origami template with design 1 bridge construction. Two individual strands form the bridge by hybridizing with each other and into origami.

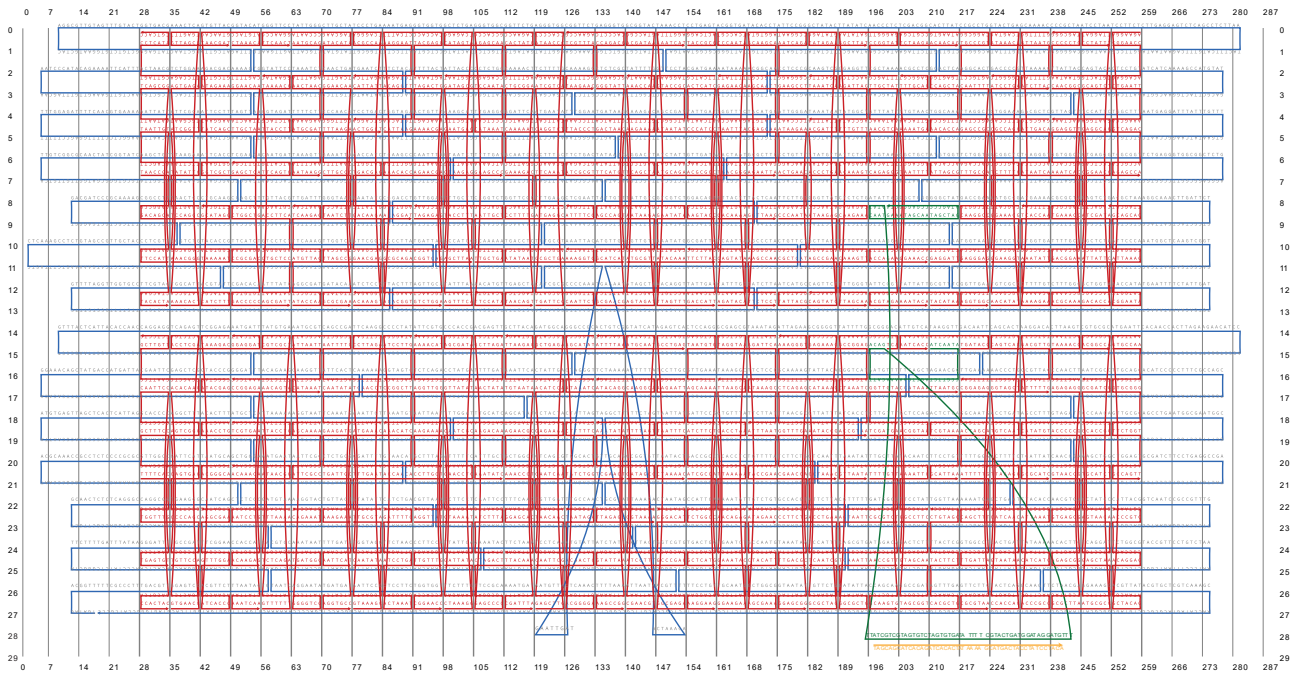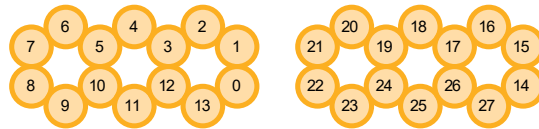

**Figure S2.** caDNAno design and illustration of the DNA origami template with design 2 bridge construction. A single strand forms the bridge by hybridizing to both the origami bundles and to the complementary.

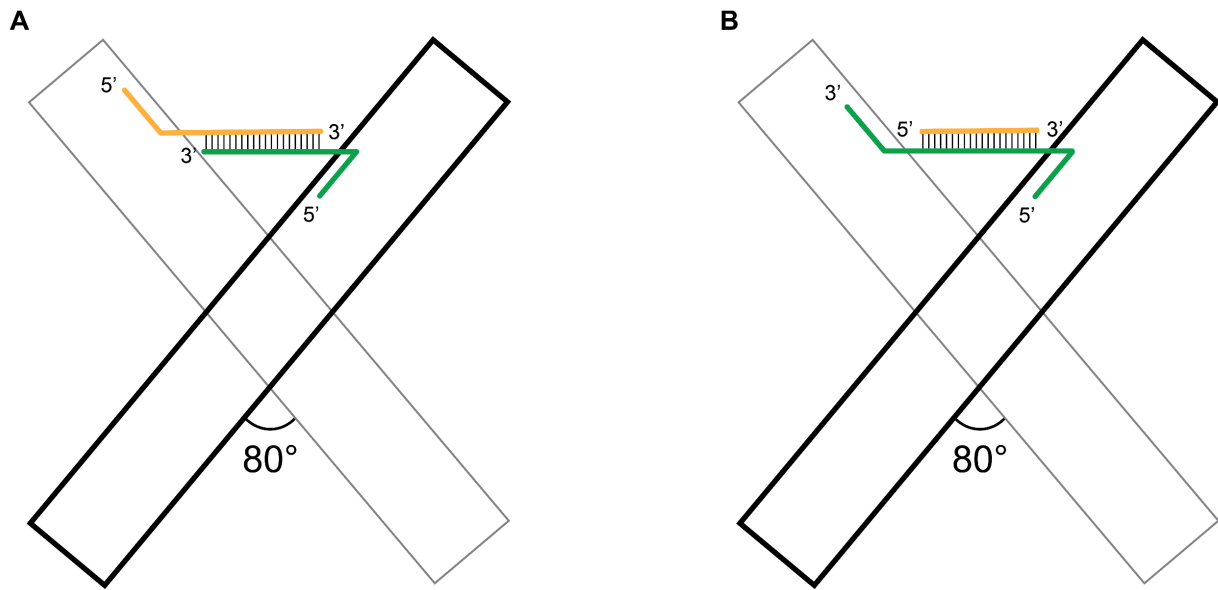

**Figure S3.** Illustration of the dsDNA bridge design in origami. The bridge staples have a two-nucleotide spacer and are designed to form an angle of  $80^\circ$  between the origami bundles. **(A)** Design 1: the bridge is formed by extensions of two individual staples from each arm; and **(B)** Design 2: the bridge is formed by a single strand hybridizing to both origami bundles and a complimentary strand.



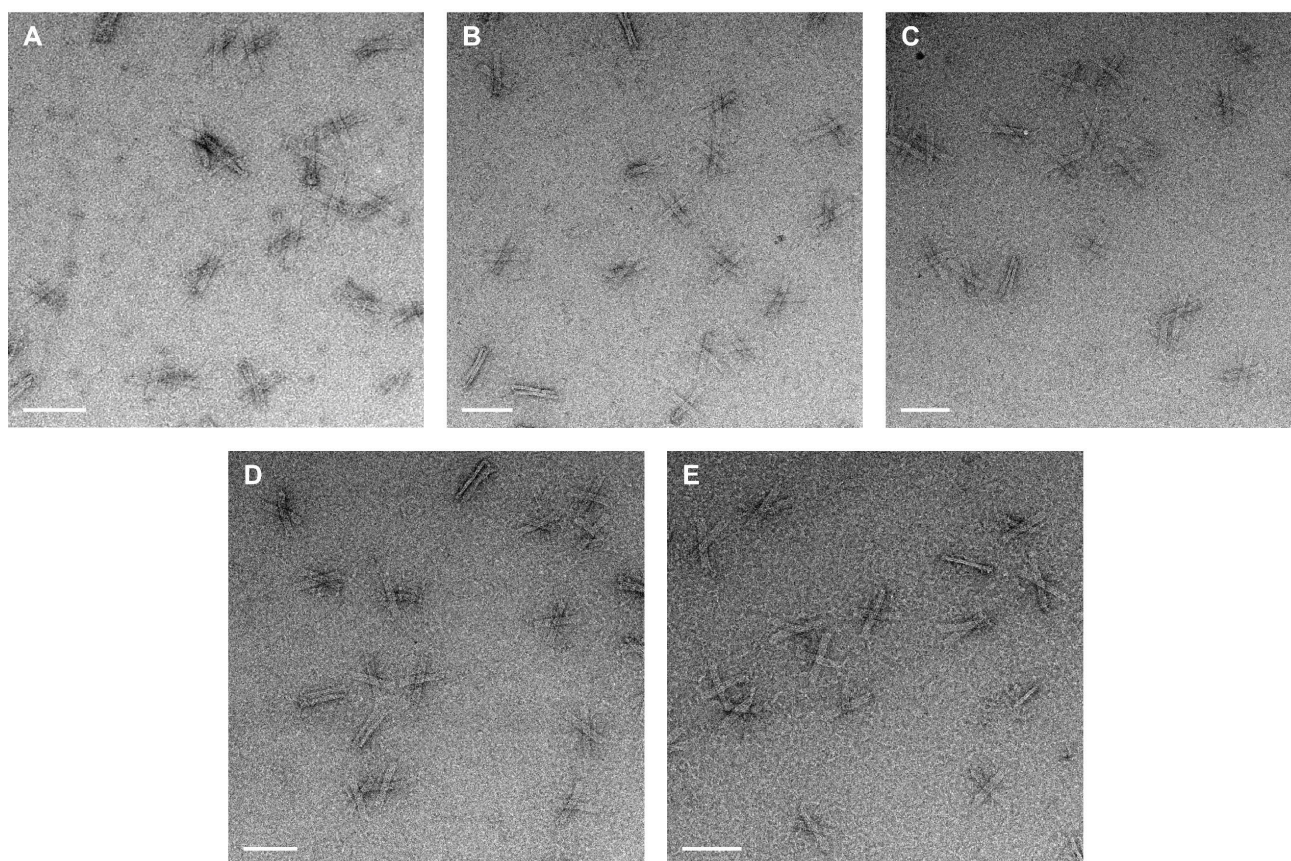

**Figure S4.** Micrographs of origami devices with varying concentrations of bridge staples in design 1. Devices were folded with (A) 20 nM; (B) 40 nM; (C) 60 nM; (D) 80 nM; and (E) 100 nM bridge staples concentration during annealing. Scale bars: 100 nm.

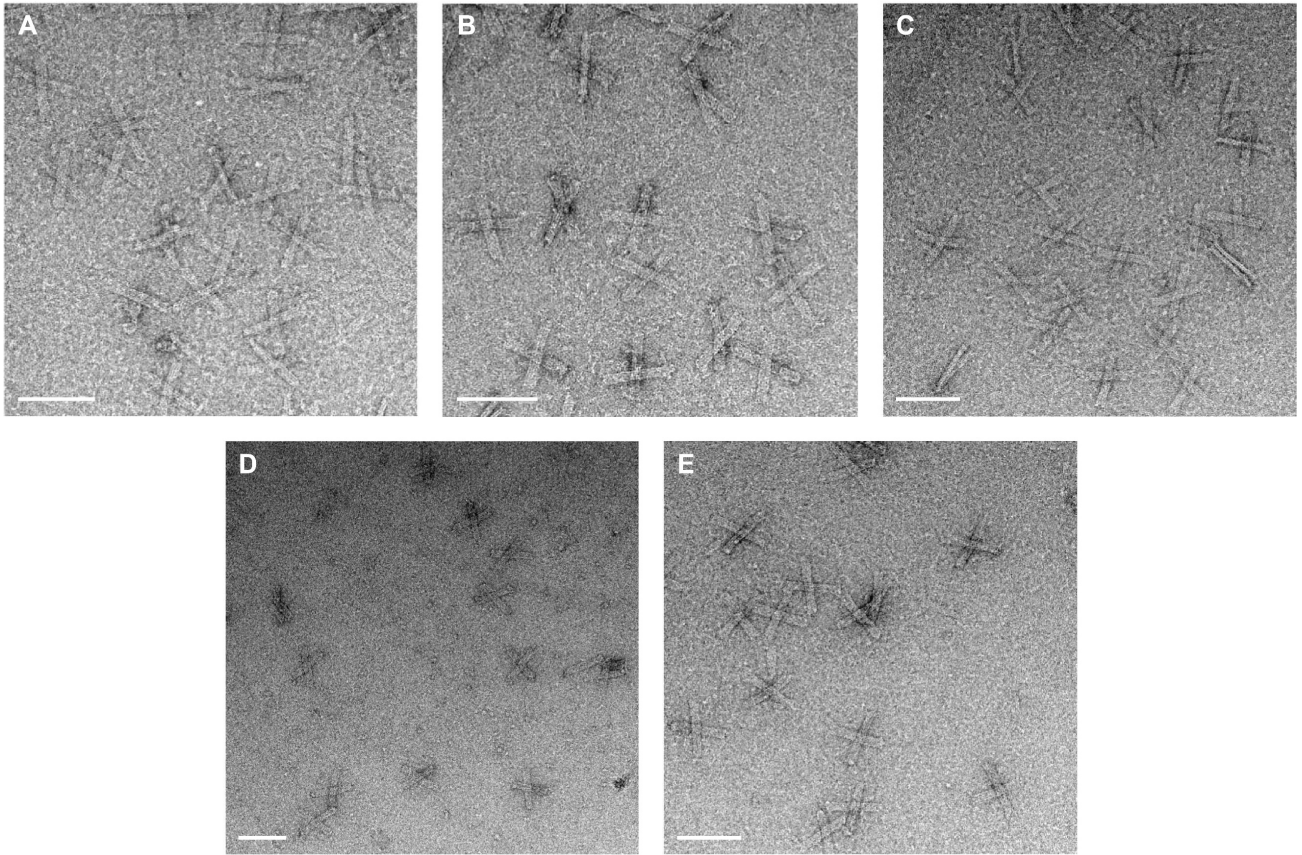

**Figure S5.** Micrographs of origami devices with varying concentrations of bridge staples in design 2. Devices were folded with (A) 20 nM; (B) 40 nM; (C) 60 nM; (D) 80 nM; and (E) 100 nM bridge staples concentration during annealing. Scale bars: 100 nm.



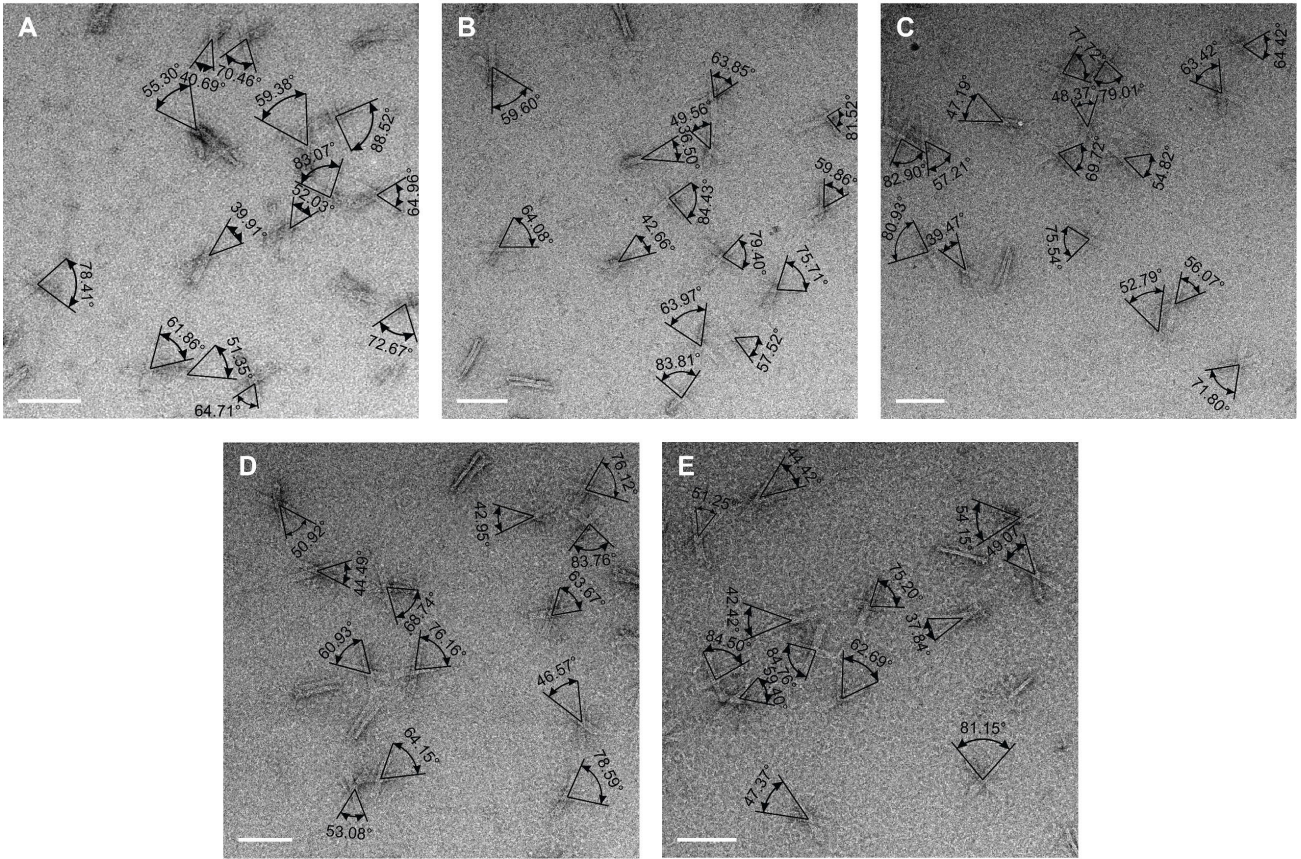

**Figure S6.** Angle characterization of origami devices with varying concentrations of bridge staples in design 1. Devices were folded with (A) 20 nM; (B) 40 nM; (C) 60 nM; (D) 80 nM; and (E) 100 nM bridge staples concentration during annealing. Scale bars: 100 nm.

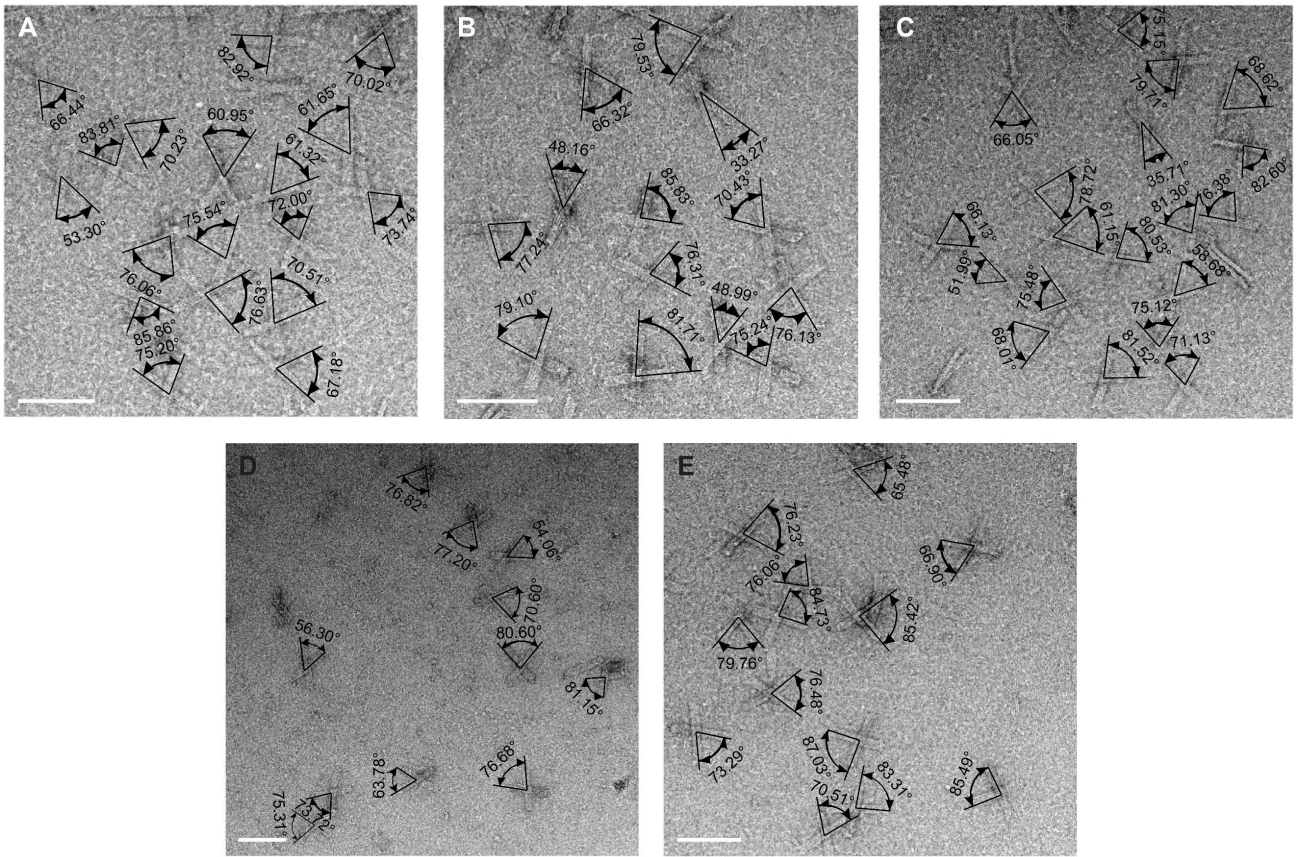

**Figure S7.** Angle characterization of origami devices with varying concentrations of bridge staples in design 2. Devices were folded with (A) 20 nM; (B) 40 nM; (C) 60 nM; (D) 80 nM; and (E) 100 nM bridge staples concentration during annealing. Scale bars: 100 nm.



### Supplementary Note 1: Considerations for angle measurement.

The following considerations were taken while measuring the angle between the origami bundles.

- Only the acute angles were considered for angle measurement.
- If a structure exhibit bending on the grid surface such that two acute angles are not similar, the smallest acute angle was taken for angle measurement (yellow circle in Figure S8).
- If the bundles of the device overlap on top, the angle was measured only if the bundles were visibly forming an angle (orange circle in Figure S8). Hence, the number of devices forming less than  $20^\circ$  was small in the dataset.
- If the structure lands parallel on the TEM grid, they were not considered for measurement (red circles in Figure S8).
- The devices that are not completely visible, e.g., half structures found on the edge of the image and overlapping devices where the bundles cannot be differentiated (blue circles in Figure S8) were not considered for angle measurement.

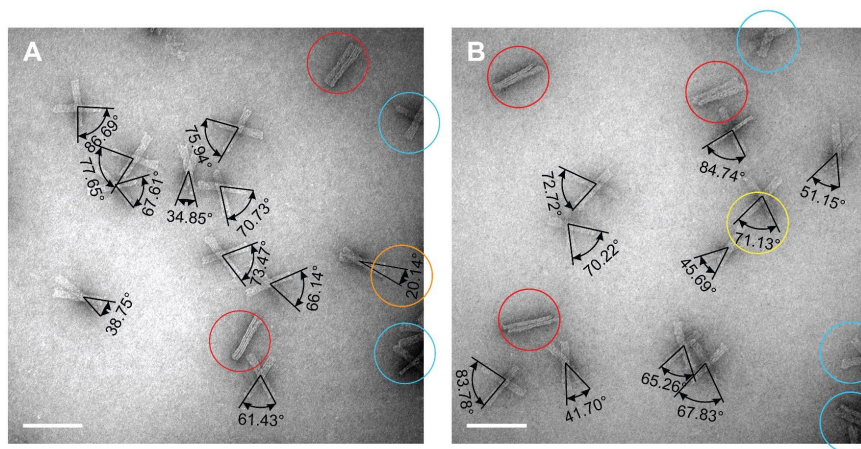

**Figure S8:** Representative origami devices not considered for angle measurements. The circles (A) and (B) represent the devices not picked during angle measurements. Refer to Note S1 for information on the circles. Scale bars and diameter of circle: 100 nm.

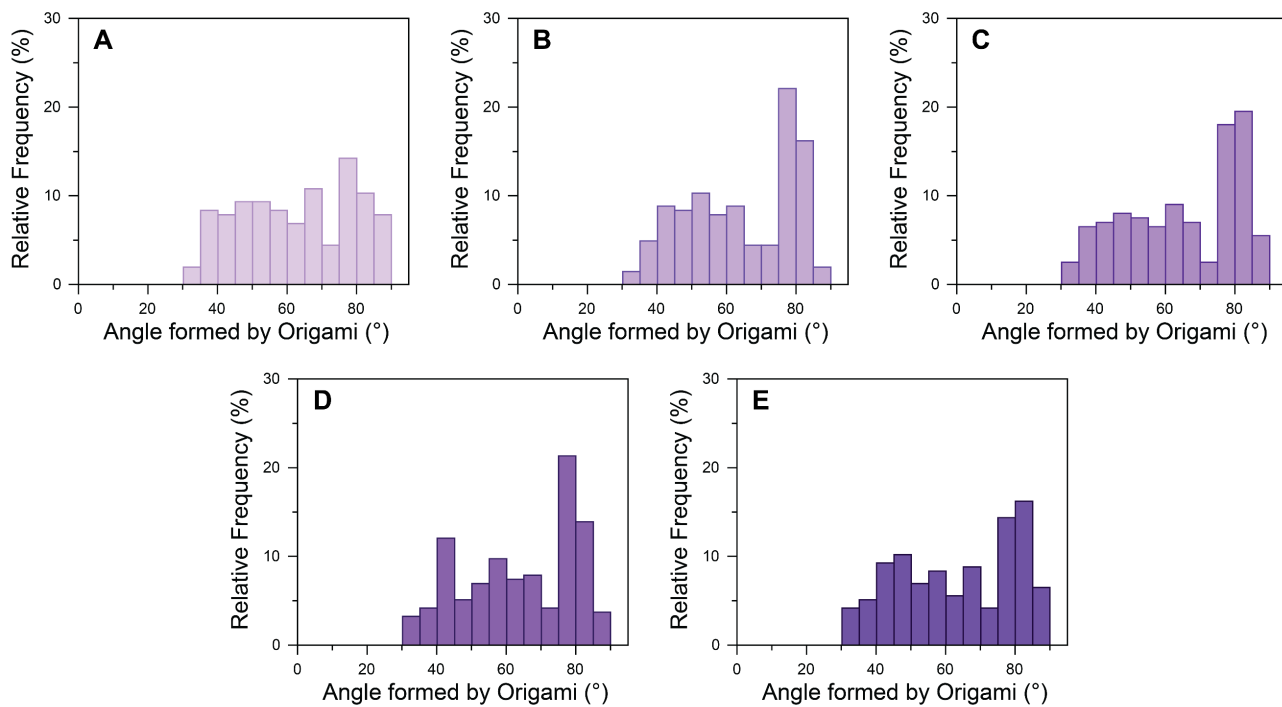

**Figure S9.** Histogram of the acute angle between two bundles of DNA origami-based device for structures folded with varying concentrations of bridge staples in design 1. Devices were folded with (A) 20 nM; (B) 40 nM; (C) 60 nM; (D) 80 nM; and (E) 100 nM bridge staples concentration during annealing.

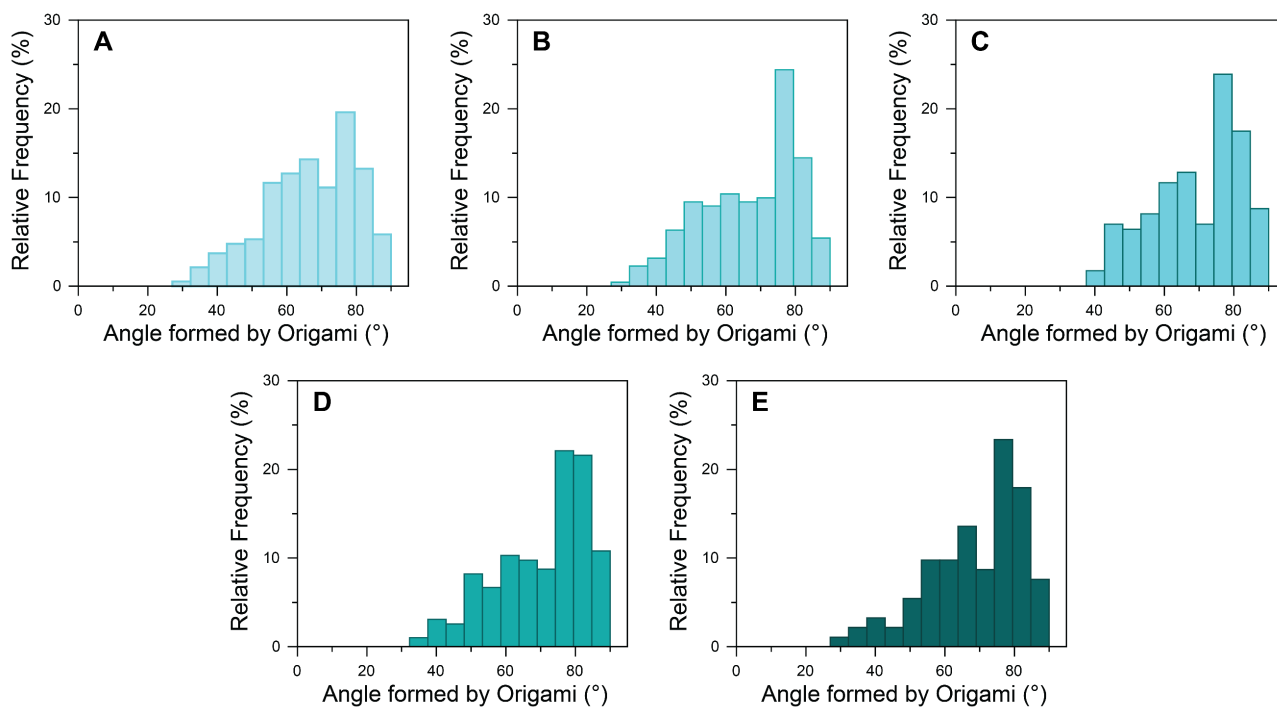

**Figure S10.** Histogram of the acute angle between two bundles of DNA origami-based device for structures folded with varying concentrations of bridge staple in design 2. Devices were folded with (A) 20 nM; (B) 40 nM; (C) 60 nM; (D) 80 nM and (E) 100 nM bridge staples concentration during annealing.

We hypothesized that when the bridging staple concentration was high (10-fold excess) in design 1, the individual staples hybridized to the scaffold in prescribed regions can find their complementary strand from the solution rather than the other staple strand, thereby forming structures without a defined angle. Whereas in design 2, while the highest yield was at 8-fold molar excess of bridging staples, the overall yield was relatively close in other experiments as well (~37% for 4-fold excess, ~39% for 6-fold excess, and ~39% for 10-fold excess), implying little dependency on the bridging staple concentration.

## Supplementary Note 2: Angle calculation

Upon addition of Human TBP to the origami structure, the TATA box bends  $\sim 90^{\circ 1-3}$  decreasing the end-to-end distance of the bridge (AD- $R_b$ ) thereby bringing the origami bundles closer and changing the angle between the bundles. The change in angle was observed using a TEM. The geometry of the bridge and subsequent change in angle are presented in Figure S11. The end-to-end distance of the bridge between the origami bundles ( $R_b$ ) can be calculated from the angle between the bundles using equation 1.

$$R_b = 2R \cdot \sin\left(\frac{\varphi_b}{2}\right) - 2r \cdot \cos\left(\frac{\varphi_b}{2}\right), \quad \rightarrow \quad \text{Eq. 1}$$

where  $R_b$  is the distance between the central pivot and the bridging staple,  $r$  is half the width of the origami bundle and  $\varphi_b$  is the angle between the origami bundles after TATA box is bent.

The bend angle of the TATA box upon TBP binding changes the end-to-end distance  $R_b$  which can be calculated as follows:

If A is considered the point of origin (0,0) then the co-ordinates of D are calculated by

$$x = L_1 \cos\theta + L_2 + L_3 \cos\theta, \quad \rightarrow \quad \text{Eq.2}$$

$$y = L_1 \sin\theta - L_3 \sin\theta, \quad \rightarrow \quad \text{Eq.3}$$

where  $\theta$  is  $\alpha/2$  and  $\alpha$  is the bend angle of the TATA box upon TBP binding. If DNA was considered as a beam entering and exiting a prism, then the overall bend angle ( $\alpha$ ) can be defined as the angle between the incoming and outgoing DNA helix. Then, the distance AD can be calculated as

$$R_b = \sqrt{x^2 + y^2} \quad \rightarrow \quad \text{Eq.4}$$

Since the end-to-end distances relate to  $\alpha$  and  $\theta$ , the value of TATA box bend angle  $\alpha$  can be calculated from the angle between the origami bundles  $\theta$ . The value of  $\alpha$  was calculated by solving the equations in Matlab.



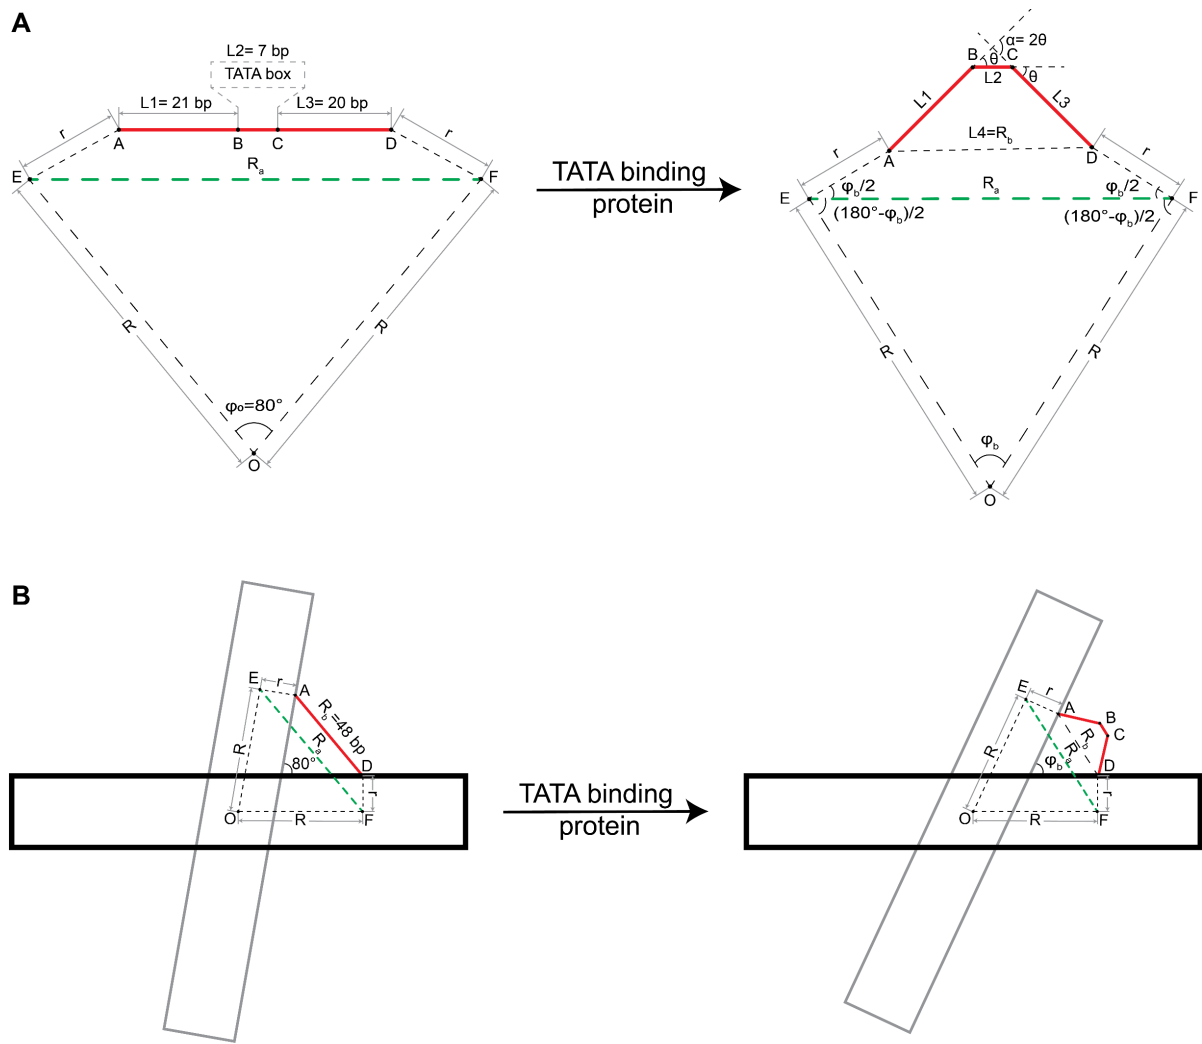

**Figure S11.** Scheme of TBP binding to TATA box and subsequent bending. The change of angle reduces the end-to-end distance thereby bringing the origami bundles closer together. **(A)** Representation of TATA box bending by TBP where  $R=64$  bps ( $\sim 21$  nm) and  $r \sim 7.5$  nm; **(B)** Representation of the change in angle between the origami bundles caused by bending of TATA box by TBP and **(C)** Two-kink model of TATA box bending.

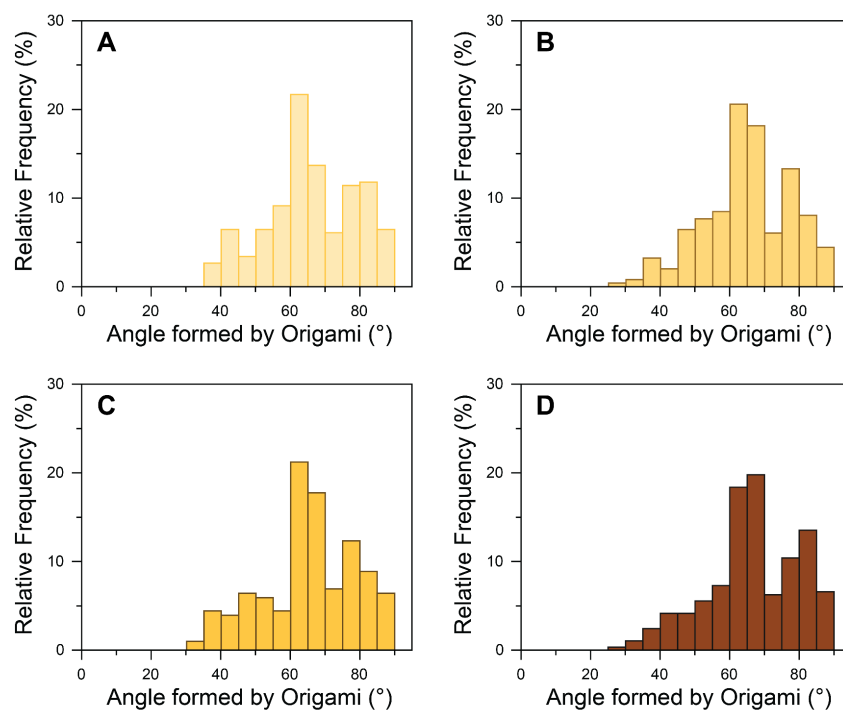

**Figure S12.** Histogram of the acute angle between two bundles of DNA origami-based device with consensus S1 sequence in design 1 incubated with TBP. The concentration of TBP was **(A)** 25 nM TBP; **(B)** 50 nM TBP; **(C)** 100 nM TBP and **(D)** 150 nM TBP. There was no significant change between the angle distribution of origami incubated with 100 nM and 150 nM of TBP.

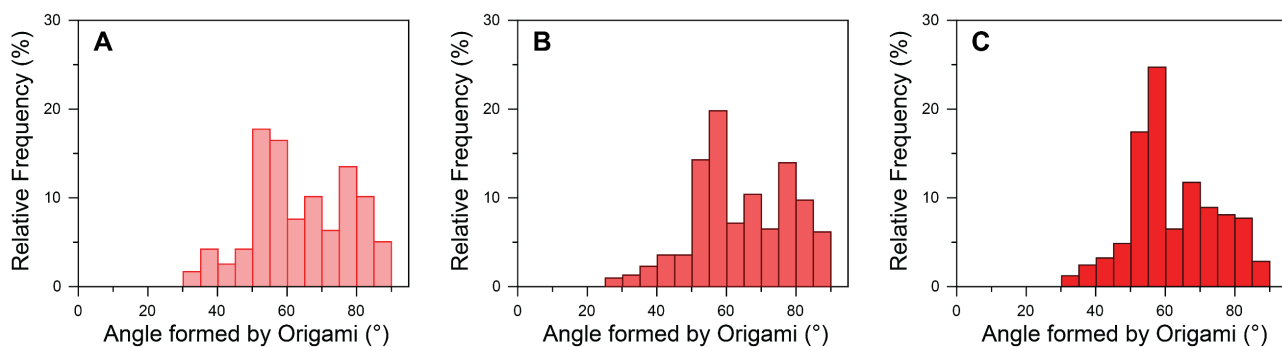

**Figure S13.** Histogram of the acute angle between two bundles of DNA origami-based device with consensus S1 sequence in design 1 incubated with TBP and TFIIA. The concentrations of TBP and TFIIA were **(A)** 25 nM TBP and 25 nM TFIIA; **(B)** 50 nM TBP and 50 nM TFIIA and **(C)** 100 nM TBP and 100 nM TFIIA. The distributions have an observable emergence of peak around 55° angle formed by origami.

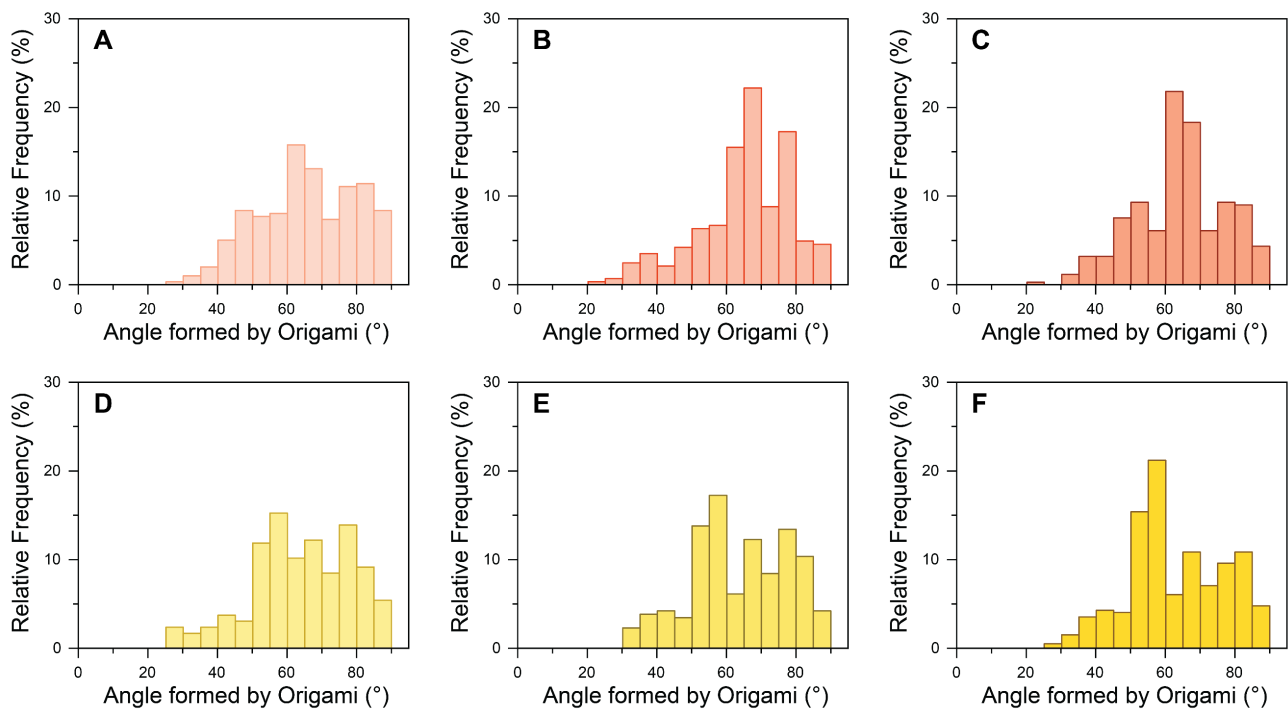

**Figure S14.** Histogram of the acute angle between two bundles of DNA origami-based device with S1 sequence incubated with TBP, TFIIA and TFIIB. The concentration of TBP, TFIIA and TFIIB were **(A)** 25 nM TBP and 25 nM TFIIB; **(B)** 50 nM TBP and 50 nM TFIIB; **(C)** 100 nM TBP and 100 nM TFIIB; **(D)** 25 nM TBP, 25 nM TFIIA and 25 nM TFIIB; **(E)** 50 nM TBP, 50 nM TFIIA and 50 nM TFIIB and **(F)** 100 nM TBP, 100 nM TFIIA and 100 nM TFIIB.

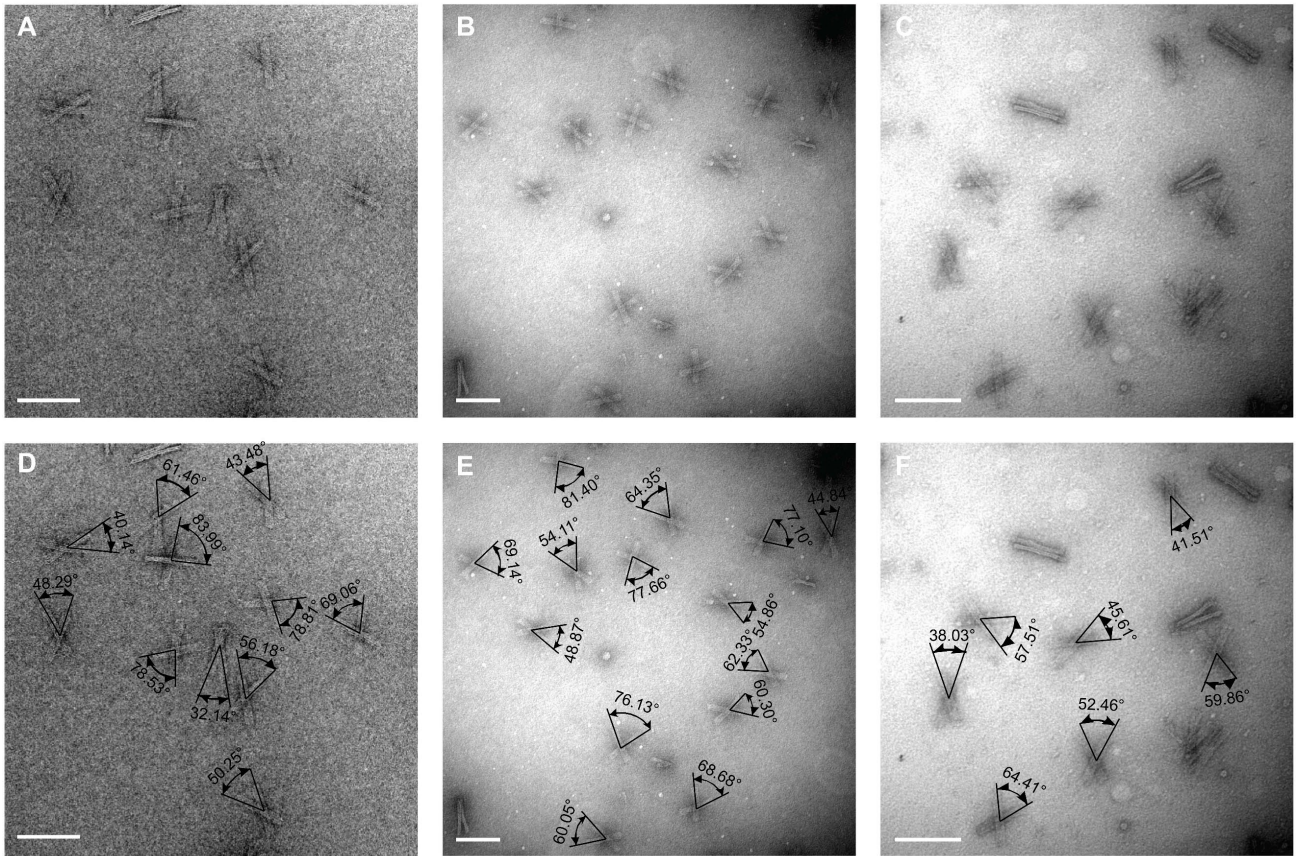

**Figure S15.** Micrographs of origami devices with S2 sequence in design 1 and their corresponding micrographs with measured angles. The micrographs represent **(A)** Control devices with S2 sequence forming 80° between the bundles; **(B)** Devices incubated with 100 nM TBP and **(C)** structures incubated with 100 nM TBP and 100 nM TFIIA. Scale bars: 100 nm.

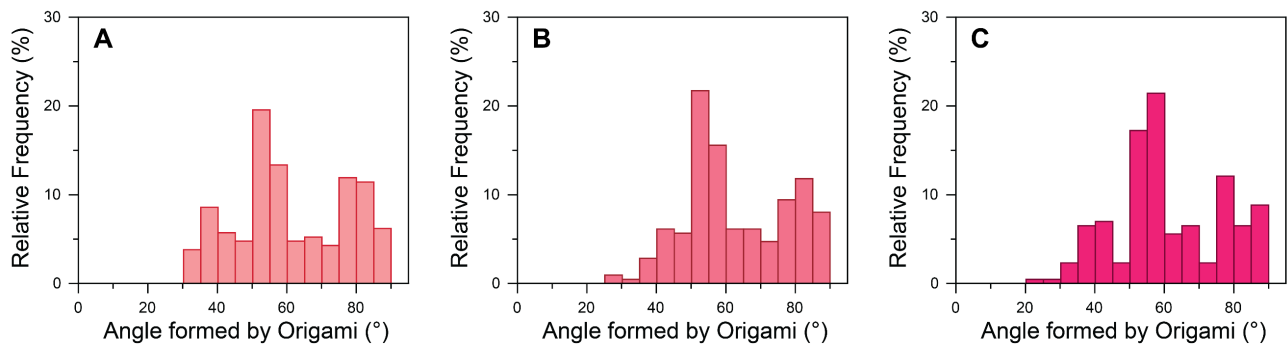

**Figure S16.** Histogram of the acute angle between two bundles of DNA origami-based device with S2 sequence in design 1 incubated with TBP and TFIIA. The concentration of TBP and TFIIA were (A) 25 nM TBP and 25 nM TFIIA; (B) 50 nM TBP and 50 nM TFIIA and (C) 100 nM TBP and 100 nM TFIIA. The distribution has an observable peak around 55° angle formed by origami. The results were similar to that of the consensus sequence indicating that these bases do not alter the extent to which the TATA box is bent by TBP.

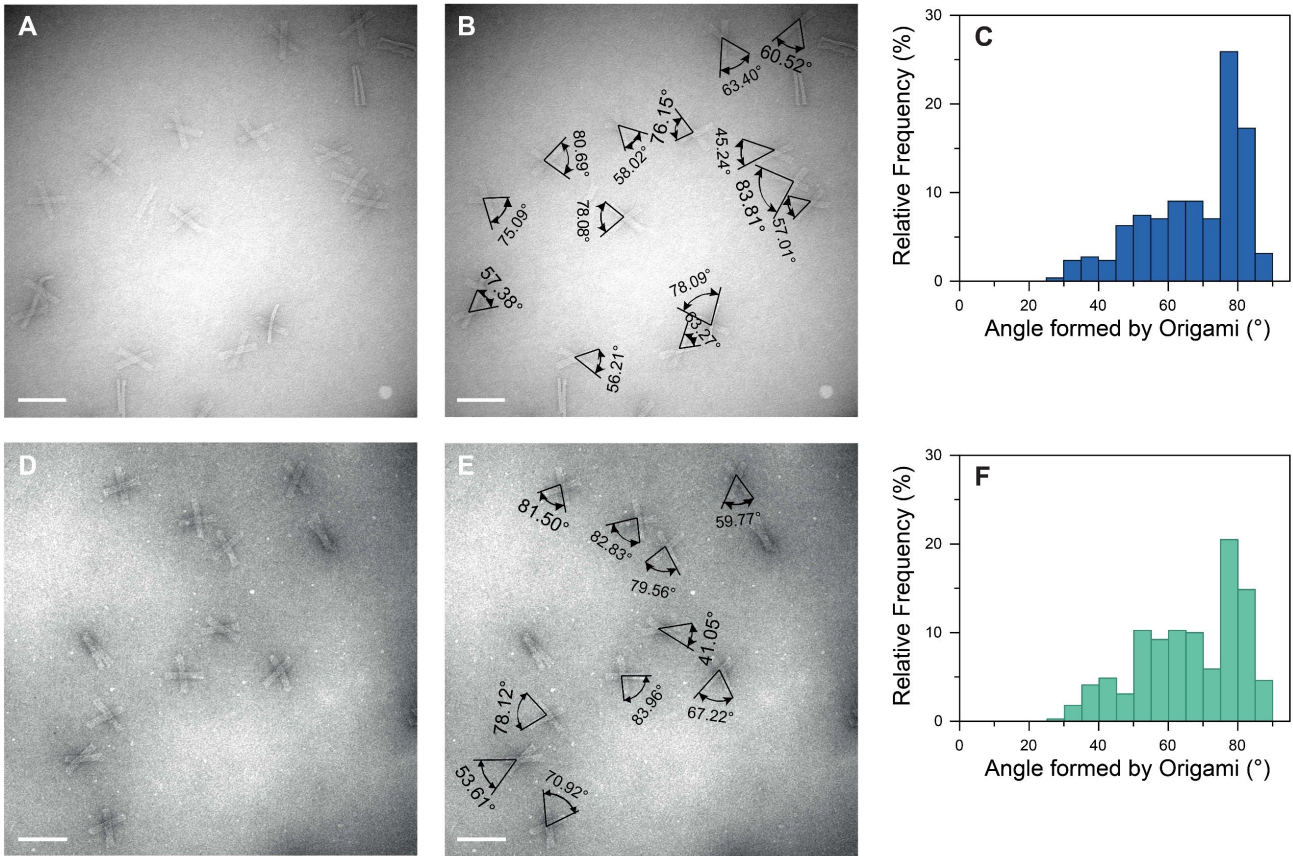

**Figure S17.** Control experiments of 80° forming origami with S1 sequence in design 1 incubated with TFIIA and TFIIB. The micrographs and their corresponding angle measurements for devices incubated with 50 nM TFIIA (**A, B**) and 50 nM TFIIB (**D, E**). Histogram of the acute angle between two bundles of DNA origami-based device incubated with (**C**) 50 nM TFIIA and (**F**) 50 nM TFIIB. Scale bars: 100 nm.



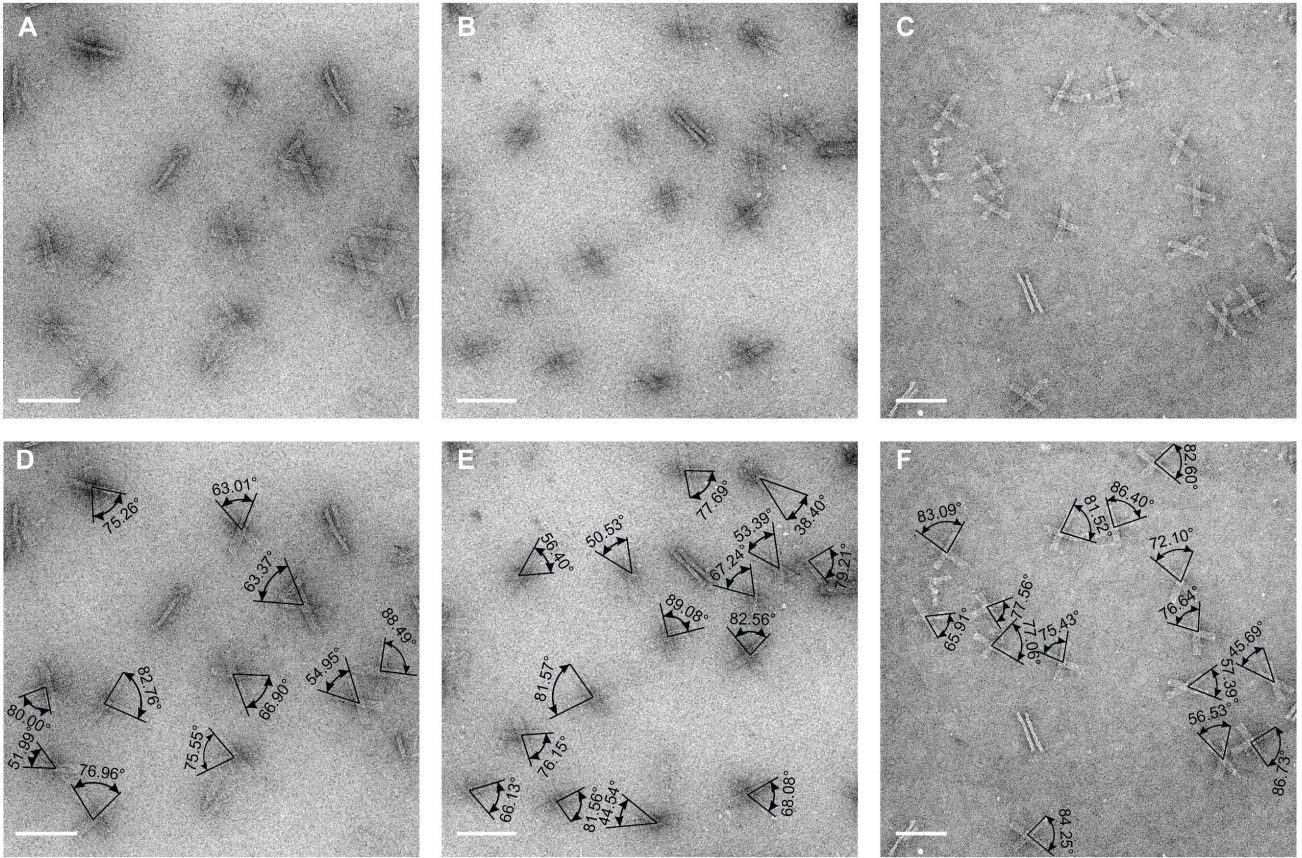

**Figure S18.** Micrographs of origami devices with scramble S3 sequence in design 1 bridge and their corresponding angle measurements. The micrographs and their corresponding angle measurements are represented in **(A, D)** Control devices with a bridge forming 80° between the bundles; **(B, E)** devices incubated with 50 nM TBP and **(C, F)** devices incubated with 50 nM TBP and 50 nM TFIIA respectively. Scale bars: 100 nm.



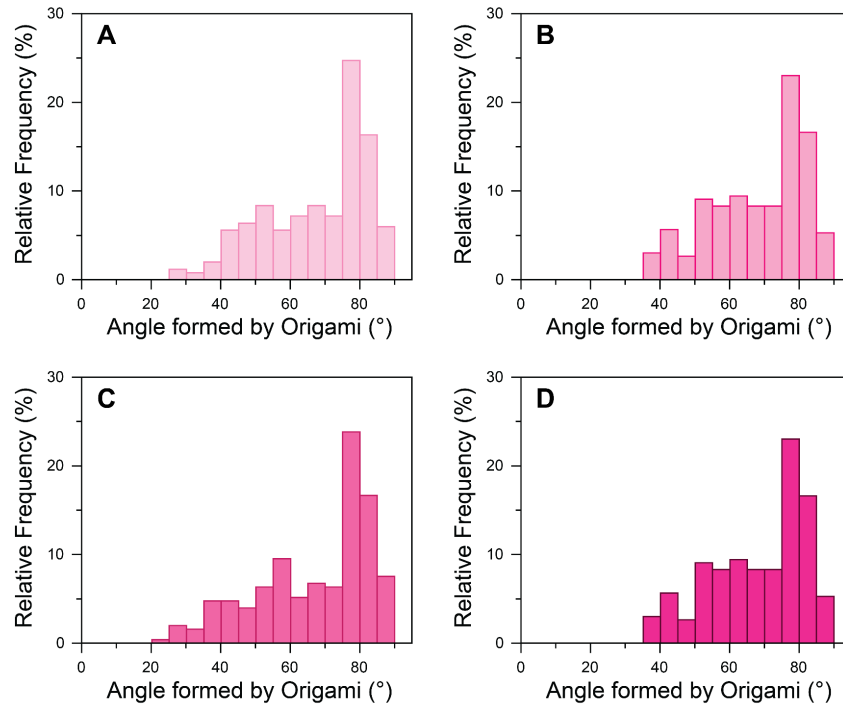

**Figure S19.** Histogram of the acute angle between two bundles of DNA origami-based device with scramble S3 sequence in design 1. The histograms represent **(A)** control devices; Sample incubated with **(B)** 50 nM TBP; **(C)** 50 nM TBP and 50 nM TFIIA and **(D)** 50 nM TBP and 50 nM TFIIB. There was no change in distribution compared to control, implying that the TATA box is required for the bending by TBP.

**Supplementary Table S1: Staple sequences for the DNA origami template.**

| Start   | End     | Sequence                                   | Length | Name   |
|---------|---------|--------------------------------------------|--------|--------|
| 4[34]   | 13[34]  | AATAATTCAGCGGCTACGAATACACTA                | 28     | core1  |
| 8[90]   | 6[77]   | AGGTCCGGATATTCTGACGAGGATGGTT               | 28     | core2  |
| 24[146] | 18[133] | AGTAATCTTTTAGTCTAGAAAAAGCCTA               | 28     | core3  |
| 25[161] | 16[161] | GAAATACCATTGCATTAAGCAGCCTTA                | 28     | core4  |
| 26[146] | 16[133] | TATTAATCAAGGCATAAAAAATTTTAGA               | 28     | core5  |
| 16[104] | 14[91]  | TCATAGGTCTGAGAAAAACATCACGAAT               | 28     | core6  |
| 22[146] | 23[146] | TCTTTAATGCGCAGTTAGAGCCGTA AAA              | 28     | core7  |
| 25[203] | 17[216] | GTAGCAAATCGGCCCATAAATTAATGC                | 28     | core8  |
| 18[34]  | 27[34]  | GGGGTGCCAATCCAACGTCACCACTAC                | 28     | core9  |
| 13[35]  | 1[48]   | AAACTTGTAGTTTGTAGCGTAACGAT                 | 28     | core10 |
| 4[223]  | 13[223] | AGCCTAACAAATTTTTCAACCAGGTGGC               | 28     | core11 |
| 25[245] | 16[245] | GAGCTAAGCTTTCCGCGATCGGGCGATT               | 28     | core12 |
| 2[139]  | 0[126]  | GCGAGAGCCAGACGCACCCTCAGAACCG               | 28     | core13 |
| 26[62]  | 16[49]  | GATTACAAACAGTACTTCTGTAAATCCC               | 28     | core14 |
| 4[76]   | 13[76]  | CGTTGGGGGAACAATTGTATCGCGCGAA               | 28     | core15 |
| 4[118]  | 13[118] | TGAATCCCTGCGGATAGCTCATAACAGT               | 28     | core16 |
| 26[230] | 16[217] | CTGAGTAGGTAGCTCAGGGTTTTTCAA                | 28     | core17 |
| 23[203] | 18[203] | GGCCTTCAAGAGTCACGGTAACTGGAGC               | 28     | core18 |
| 27[140] | 15[153] | CGAACGTATGATACATGCAATGCCTGAG               | 28     | core19 |
| 9[245]  | 4[238]  | ATCGATATAGAGCCGAGGCAGGAATGGAACTAAC         | 35     | core20 |
| 2[202]  | 13[195] | TTTAGCGCCGGTATGAGGGTTGATATAATTAGCAA        | 35     | core21 |
| 12[174] | 12[182] | TAAGATCAAGCCAACGCTCATAGCCGAAAGAACTG        | 35     | core22 |
| 27[98]  | 16[105] | CTAAAGGCGGTGGGAGCGATAGCTTAGAATCAAAA        | 35     | core23 |
| 25[140] | 22[147] | ATCCTTTGCCCGACCACGACCGGGACATCTATTAG        | 35     | core24 |
| 1[49]   | 12[42]  | CTAAACAATGTACCGTAACACCATCTTTAATACGT        | 35     | core25 |
| 23[175] | 19[195] | CCTTCTGACCTGAAAAATGGAAATACCGACCGTAA        | 35     | core26 |
| 18[132] | 21[139] | CTAATAGCTTTTTCAGTGCCATATCTGGTCAACT         | 35     | core27 |
| 6[97]   | 8[91]   | TAAATTGGGCTTGAAAAACCCAGAACGACTCCAAC        | 35     | core28 |
| 27[77]  | 16[84]  | GTAAAGCCCTTGAACTTAGAATCCTTGACTACC          | 35     | core29 |
| 5[84]   | 9[90]   | CATTAAGAAAACGATTAATCATAAGGGAACAGGAT        | 35     | core30 |
| 4[202]  | 13[209] | AATAAACTTGCTATACGGAATACGTAGAAAATACA        | 35     | core31 |
| 22[83]  | 22[91]  | AATATACTTTGAATACCAACACCTTGCTTTAACG         | 35     | core32 |
| 19[196] | 23[202] | TCGATGATGTCCATCACGCTGAGTAATTCGCGTCT        | 35     | core33 |
| 2[181]  | 13[174] | CGGGAGGAATCAGACCGGAATAGGTGTATTCTCCT        | 35     | core34 |
| 6[153]  | 9[160]  | AATAGATATGCAGAACGCGCCTCTGTCCAAGTACC        | 35     | core35 |
| 25[77]  | 18[84]  | CAATATACGGAATTTGAACCTCCGGCTTACATTA         | 35     | core36 |
| 21[196] | 21[188] | TTTTGTTCGCCATCAAAAACGTAAGAATCCTAAAC        | 35     | core37 |
| 1[154]  | 13[160] | TACCGCGACTCAGGAGGTTTATTAGTTTGACCATT        | 35     | core38 |
| 22[209] | 21[195] | ATAGGAAAAAATTCGATTGTATAAGCAAATATTTAGTTAATA | 42     | core39 |
| 7[175]  | 7[174]  | ACTGAACACAAGAATTGAGTAAAGTAATTGACGGGAGAATTA | 42     | core40 |
| 19[168] | 22[168] | ATTTAATTAACATACCGAACGAACCAACGTGGCACAGACA   | 42     | core41 |
| 24[111] | 20[98]  | GTATTCATCTTTAGGAATTGAGGAAGGGAACCTCGAAAAAT  | 42     | core42 |

|         |         |                                                    |    |        |
|---------|---------|----------------------------------------------------|----|--------|
| 27[56]  | 17[69]  | GTTTTTTTCACATACGTCGCTATTAATTAACCTGCATAAAT          | 42 | core43 |
| 4[139]  | 11[139] | CTTATCATTCCAAATTACCCTGACTAACCCAACATGCATCAT         | 42 | core44 |
| 22[251] | 21[237] | GGATAGGTGCATCTCCAGCTTTCGGTTGATAATCAGCGCATC         | 42 | core45 |
| 7[140]  | 7[139]  | TCAGCTAAAGTCTTGATTATAGTCAGAAATCGCGTTTCATGT         | 42 | core46 |
| 23[77]  | 20[77]  | TTGCGTACCTACCAATGAAACAAACATCATGTTACAAAATCG         | 42 | core47 |
| 22[62]  | 22[63]  | TTACATCGGGAGAGAATCCTGTTTAAAACAGAAATGTACCTT         | 42 | core48 |
| 12[195] | 8[182]  | ACCCAAACAAAGTTTAAAGAAAACAAGAAACAGAGAGATAACCC       | 42 | core49 |
| 3[238]  | 1[251]  | CAACGGCGCCAAAGACGCAAAGACACCATTAGGATCCTATTT         | 42 | core50 |
| 4[160]  | 11[160] | ATCAATAAECTCATCGTCAATAAECTGTTATACAAATTCCTAC        | 42 | core51 |
| 16[160] | 26[147] | TTTCAACTAATGTGCCTGGAGTGACTCTGGCGAGAAAAACGT         | 42 | core52 |
| 20[48]  | 20[49]  | TGCATTAACGGGCAACAAACAATAACGGATTCATTTCCAGC          | 42 | core53 |
| 11[35]  | 4[35]   | AAACGGGTAAAAATCGGTGTACAGACGGATCGGTTTGCGAAT         | 42 | core54 |
| 17[238] | 15[251] | AGAGAGGTCGTTAGGCGCTTAATGCGCCGCGCACGACGGCCA         | 42 | core55 |
| 6[48]   | 6[49]   | GGTGAATGGTCGCTGAGCTCATTCAGTGATCATTTGTTCGA          | 42 | core56 |
| 7[28]   | 8[42]   | TAACCGAAAGGCCGGACAGCATCCAGGCGCATAGGCTTGCAG         | 42 | core57 |
| 16[153] | 21[153] | GCAAGGAAAGAATTATAATTATAATTCAGTATTACTAAAAC          | 42 | core58 |
| 10[153] | 9[139]  | CATATTTGAATATAAGACGACGACAATAAAACAATAAGCCAGT        | 42 | core59 |
| 13[119] | 3[132]  | TGATTCCCCACCTATAACCCTCGTTTAGCTTTTGTAGAAC           | 42 | core60 |
| 16[244] | 26[231] | AAGTTGGTAAAACGACTTAAGTGCCTTACCCGCCAACTTGC          | 42 | core61 |
| 7[112]  | 8[126]  | GAAAGACGCGAACCCCTTTTGATGAGGCATTTTCGATTCGAG         | 42 | core62 |
| 27[119] | 14[133] | GAGCTTGTGCCATCGCTGAGAAGCATATATTTTAACGACAGT         | 42 | core63 |
| 25[224] | 22[224] | GTAATAACATCATCTTTTATAATTAATGGTGTAGATTCAGC          | 42 | core64 |
| 12[181] | 1[195]  | GCATGATTATTACGAGTATGGTATAGCTATAGAAGGCTTAT          | 42 | core65 |
| 2[76]   | 1[62]   | TCAGTTGATACATATAGCAAGCCCAATAGGAACCCCTCAACT         | 42 | core66 |
| 27[35]  | 14[49]  | GTGAACCACTTGAACCTCGATAAAGACGGAGGATAATCATT          | 42 | core67 |
| 22[125] | 24[112] | ATCAACACAATCAACGCTGAGAGCCAGCAGAACGCTTTAGAA         | 42 | core68 |
| 6[76]   | 12[77]  | TAATTTCTTTAAGATGACCAATTAGCCGGAACGAGCGGAGAT         | 42 | core69 |
| 7[70]   | 5[83]   | CTTGCCATTACCCTAATCTTGACAAGAACCGAACACTGGCT          | 42 | core70 |
| 18[244] | 25[244] | AATCTACAAAGGCTCATATGTACCCCGGAAGTGTAGAGCGG          | 42 | core71 |
| 27[224] | 17[237] | CCACCACAGTGTGCAGTCACGACGTTGGTAACGCATTTTGT          | 42 | core72 |
| 2[97]   | 13[97]  | AGTAAAATACGAGGCACCACCCTCATTTACACGGTGTCTGGA         | 42 | core73 |
| 12[41]  | 0[28]   | AATGCCAAGTGAGATTCCAGACGTTAGTCTCATACGTCACC          | 42 | core74 |
| 13[224] | 3[237]  | AACATATTCAGTACATAAACAGTTAATGGTTTTAAATCTTAC         | 42 | core75 |
| 14[174] | 23[174] | CTATTTAAGCGAAACGCCAGCCTACATTCATTGGCATAGAAC         | 42 | core76 |
| 10[125] | 10[126] | AGGCAAAGAGGTCAATATAATGCGCTGAAAAGGTGGTAATTT         | 42 | core77 |
| 2[118]  | 12[105] | AGTTTTGCACTATCCAGAACCGCCACCCTTCCATAACATGTT         | 42 | core78 |
| 8[250]  | 11[244] | AGACTGCGGAACCCCTCAGAGCCACCGAGGTTAGCAAAGACGGAA      | 48 | core79 |
| 3[133]  | 1[153]  | GGGTATTATTTTCAGCGAACGAGTAGATGTACCGCACGATAAAAATCAT  | 49 | core80 |
| 25[56]  | 18[49]  | TCTCAGATGATGGCATTATTTGCACGTGTTACCTGTTTTAATGAGCAT   | 49 | core81 |
| 23[91]  | 21[111] | AGGTTATCTAAAATTGAATAACAATCGCAAGACAAAGCAAATAAATATC  | 49 | core82 |
| 11[105] | 7[111]  | TTGCTGATTTTGAATTGCTAGACCGGAAGCAAAGTAAGAGGAAGCCC    | 49 | core83 |
| 2[195]  | 7[202]  | AACCTCCAGATTAGACCATATTTGTTTAGAGAATACAAAGTCAGAGGG   | 49 | core84 |
| 27[161] | 18[168] | GGAAGAACGCTCGCTAGGTAAGATTACGGGAGAAAATAAGCATAAGAA   | 49 | core85 |
| 4[237]  | 9[244]  | GAGCGTCATTGACAACCCTCAATAATCAAAAATCACTAGCGCGTGAAACC | 49 | core86 |

|         |         |                                                     |    |               |
|---------|---------|-----------------------------------------------------|----|---------------|
| 21[238] | 18[245] | GTAACCGTCACGTTGTGAGCGAGTAAACAATCCTGAGCACCGCTGTTGGG  | 49 | core87        |
| 21[28]  | 18[35]  | TTTTACCCGCCTGTGGTTTGC CCCAGCATCGGCAAGTCGGGAAAGCCT   | 49 | core88        |
| 2[216]  | 11[223] | TGAGTGCCAGCTATTTGCCAAACACCAGAGCCGCATTACCAGAGGGAG    | 49 | core89        |
| 16[83]  | 26[63]  | TTTTTTGAGTGAATAATTTCTCGGCTGACGCATTGGGGTCGTATTCT     | 49 | core90        |
| 27[203] | 22[210] | TAGCGGTCACGCTGTCAAACCTACTTCTCGAGTAACTGTAGCTTAACCA   | 49 | core91        |
| 15[252] | 21[258] | GTGCCAAGCTGCAAGTGCGGGGCGCAACTTCTGGTACTCCAGGCCAGTT   | 49 | core92        |
| 4[97]   | 11[104] | AAACAGTTAGACTGTGCAACTAAAGTAAAGCGCAGACGGTCAGAGCTTAA  | 49 | core93        |
| 18[69]  | 23[76]  | ATTACCTAGCAAAAAGCGAATTATTCGCTGATTGCAGTAAACAAAAGAAA  | 49 | core94        |
| 7[182]  | 9[174]  | ACCCTGAAACATAAAAAACAGGATAAGAAAAGAACAGTAGGGCTGGTTAAG | 49 | core95        |
| 21[154] | 18[161] | ATCGCCATGAATGGTCTGGCCAACAGAGAGATTACAGACCTAATAAACAC  | 49 | core96        |
| 2[160]  | 10[154] | TTCATCGTAGGAACGTACCGCATCGGCTATAATATCCCATCCGAATCGC   | 49 | core97        |
| 0[237]  | 8[231]  | GTTTTGCAAAAAGAAAACAAAAGAAATATTTACCAGTCACCAATTTTCAT  | 49 | core98        |
| 7[203]  | 11[209] | TAATTTTAGCAGCCTTTACAGAACGTCACCCTTTACCAGAAGGAAACC    | 49 | core99        |
| 14[258] | 22[252] | AATTCATGCTACAGATAACGTACAGGAGCGCCAGAACCCGTCGGTAATG   | 49 | core100       |
| 25[35]  | 14[28]  | TGTTCCAGGACTCCACACAACCGAGCTCGAATTCGGCTTGTTCTCTCTG   | 49 | core101       |
| 25[182] | 14[175] | TCAATCGCAGAACACATAAAGTGTAATACTTTTGCAAAGGGTTTCTAAT   | 49 | core102       |
| 1[252]  | 7[258]  | CGGAACCACAGGAGCTGAATTAAGCCAGTCAGACACCGCCAAGAGCCA    | 49 | core103       |
| 2[223]  | 1[216]  | AGTGCCTTGCCCGTCAGGCGGATAAGTGCCGTCGATCTAAGAACAACAG   | 49 | core104       |
| 8[230]  | 7[223]  | CGGCATTTCTTTTCGAGCCGCCACCAGAACCACATATTAGCGTTTGCCA   | 49 | core105       |
| 22[41]  | 25[34]  | CCCTTACAGTGAGATGAATCGGCCAACGCTTTCCAAATCCCTGAGTGT    | 49 | core106       |
| 14[48]  | 22[42]  | TCTCCGAATCACCCAGAACGTGTTTGATTCCGAAAAGGCGAACTGATTG   | 49 | core107       |
| 11[245] | 0[238]  | ATTATTCTACCAGCGCAGTCTGTACTGGTAATAACCCCTGTAGCGGG     | 49 | core108       |
| 14[132] | 22[126] | GCGGCCACGGGGAGTTGAGACAACCTCAATACATTAATAGATTGGCAA    | 49 | core109       |
| 21[217] | 18[224] | ATTTTTGTCATTTTCAGCTTTTCATCAACATCAGTGTGTCAATATCAGGT  | 49 | core110       |
| 1[63]   | 7[69]   | AATGCAGAGATTTAAACTAACAAGAAAAATGCGATAACTTTAAATAAGG   | 49 | core111       |
| 27[182] | 18[189] | GCGCTAGACCCCGCGAGAAAAGGCCGAGATGACCCTAAATCAGGTGAT    | 49 | core112       |
| 25[119] | 14[112] | CAATTCGTAACATTACATCCATCAATAGTGAATTTTAAGACTGTAAGC    | 49 | core113       |
| 14[90]  | 22[84]  | ATAGGGGACTAAATGAAGGAGATCCTGAGTTAGAAGATTTTCTCAGATG   | 49 | core114       |
| 12[104] | 6[98]   | TTAAATAGATAGCGTCCAATACCCTCAACATAAATATCAAAAAGATTAG   | 49 | core115       |
| 8[41]   | 11[34]  | GGAGTTATATATTCTTCTTAAACAGCTTTAATTGTAACGAGGTTCCATT   | 49 | core116       |
| 9[161]  | 6[154]  | GACAAAATAATTGATAATTTACGAGCAAGAAGCGCATTAGTTTATCAAC   | 49 | core117       |
| 21[112] | 18[119] | AAACCCTGTTGAAAGGAGCACTAACAACCTGAGGAGAGAAAATAGTAGC   | 49 | core118       |
| 2[55]   | 13[62]  | CAGTTTTGTCGTCTATAGAAAAGGAACAATGTGTCGGACCCCGAGCGATT  | 49 | core119       |
| 0[258]  | 8[251]  | AGAAGGACGGAATATATGGTTATTAAGTGGGAATGCAGCACTTAGCGTC   | 50 | core120       |
| 11[140] | 2[140]  | ATGCGTTTAGCTATAAACCAACAAAATA AAAAAAAAAA             | 28 | handle A10 1  |
| 18[160] | 27[160] | CGGAATCAGCAAAAACAGGAAAAGGAAG AAAAAAAAAA             | 28 | handle A10 2  |
| 20[97]  | 25[97]  | CTAAAGCAAGAAAATGGAAGTTGTTG AAAAAAAAAA               | 28 | handle A10 3  |
| 3[77]   | 4[77]   | CATTATTACAGGTTTCTACCAGTCAGGA AAAAAAAAAA             | 28 | handle A10 4  |
| 4[181]  | 2[182]  | TCCCAATGAAGCCTTAAATCACGACTTG AAAAAAAAAA             | 28 | handle A10 5  |
| 9[140]  | 4[140]  | AATAAGAAACAACGAAGAAAAGTCTTTC AAAAAAAAAA             | 28 | handle A10 6  |
| 20[76]  | 25[76]  | CGCAGAGGAAGATGTATCAAAAATTCAT AAAAAAAAAA             | 28 | handle A10 7  |
| 18[202] | 27[202] | AAACAAGGGTTGTATTGCTGGGCAAGTG AAAAAAAAAA             | 28 | handle A10 8  |
| 18[223] | 27[223] | CATTGCCCGGAGAGGAAGAACCGGTAA AAAAAAAAAA              | 28 | handle A10 9  |
| 11[224] | 2[224]  | GGAAGGTGGCGACAATCCTGACGGGGTC AAAAAAAAAA             | 28 | handle A10 10 |

|         |         |                                                                                                    |    |                         |
|---------|---------|----------------------------------------------------------------------------------------------------|----|-------------------------|
| 18[48]  | 25[55]  | AAAGTGTAACCTGTCGTGAAATGGTGGACAAGAG AAAAAAAAAA                                                      | 35 | handle A10 11           |
| 16[132] | 27[139] | ACCCTAGATAAATCATAACAGGTTTAAAAAAGCCGG AAAAAAAAAA                                                    | 35 | handle A10 12           |
| 9[91]   | 4[98]   | TAGAGAGTACCTTTGGATGGCGAATGACATGCTTT AAAAAAAAAA                                                     | 35 | handle A10 13           |
| 13[210] | 2[203]  | TACATAAGAAAACGCAATAATATTTGCACGAGGCGT AAAAAAAAAA                                                    | 35 | handle A10 14           |
| 18[83]  | 27[76]  | ACAATTTTCATTTGACAATATAATCATCAAGGTGCC AAAAAAAAAA                                                    | 35 | handle A10 15           |
| 11[210] | 4[203]  | GAGGATTTTATCTTACCGAAGAAAATGAGTTACAA AAAAAAAAAA                                                     | 35 | handle A10 16           |
| 20[188] | 25[181] | AATTGAGCAGAAGAGGTTTGATTATTATTGACGC AAAAAAAAAA                                                      | 35 | handle A10 17           |
| 13[126] | 2[119]  | CAATTCTTTTGGGGCGCGATGATCGTCACAAAAGA AAAAAAAAAA                                                     | 35 | handle A10 18           |
| 14[195] | 25[202] | CAAAATAGGCGCTGTAATATCTCAAATTAACCGTT AAAAAAAAAA                                                     | 35 | handle A10 19           |
| 18[188] | 27[181] | AAATAAGGCGTTAACTCAGAGATATTACGGAGCGG AAAAAAAAAA                                                     | 35 | handle A10 20           |
| 14[111] | 25[118] | AACTCGTGAGCCCTGCGGAACTAGACTTTACAAA AAAAAAAAAA                                                      | 35 | handle A10 21           |
| 16[48]  | 27[55]  | CGGGTACATACGAGCCGAGACTATTAATAATCAA AAAAAAAAAA                                                      | 35 | handle A10 22           |
| 9[175]  | 4[182]  | CCCAATAATAAGAGAGTAAGCACGATTTTATTTA AAAAAAAAAA                                                      | 35 | handle A10 23           |
| 21[140] | 25[139] | GATAGCCACACCGCTGCAACAAATATAAATAGATGTATTAA AAAAAAAAAA                                               | 42 | handle A10 24           |
| 10[55]  | 2[56]   | AGATGAACCGCGACCTGCTCCGATAAATTAACGGGAATAC AAAAAAAAAA                                                | 42 | handle A10 25           |
| 13[98]  | 2[98]   | AGTTTCATCAGAGCCATAGTAAGAGCAACCAGAGGGGTAAT AAAAAAAAAA                                               | 42 | handle A10 26           |
| 4[55]   | 4[56]   | TTAACTAAAGGAATTATCAGCTTGCTAATTACCTTATCTACG AAAAAAAAAA                                              | 42 | handle A10 27           |
| 11[161] | 4[161]  | CAGTATAGCAAATGGAGAACAAGCAATCCATGTAGAAACCA AAAAAAAAAA                                               | 42 | handle A10 28           |
| 21[224] | 25[223] | TTAAAGGGAAAAGCCCCAAAACTAGCAAGGCCACTTGATTA AAAAAAAAAA                                               | 42 | handle A10 29           |
| 13[77]  | 2[77]   | ACAAAGTTCAGGGAACGCCAAAAGGAATTGTAGAAAGATTCA AAAAAAAAAA                                              | 42 | handle A10 30           |
| 13[161] | 2[161]  | AGATACATCACCGTCCCAATAGCAAGCATTGCCGTTTTTATT AAAAAAAAAA                                              | 42 | handle A10 31           |
| 8[223]  | 4[224]  | TTCGGTCCAAGGCCGAAACGTAGCACCCGCCAGCTTCCAG AAAAAAAAAA                                                | 42 | handle A10 32           |
| 18[118] | 27[97]  | ATATGCTGATGCAAATCCAAAATTAATTAGGTTGGACCACCACGGAACC<br>AAAAAAAAAA                                    | 49 | handle A10 33           |
| 8[125]  | 4[119]  | CTTCAAATTCAAAATGCAAAGCGGATTGCCAAAAATCAGGTCTTATTCAT<br>AAAAAAAAAA                                   | 49 | handle A10 34           |
| 22[167] | 25[160] | ATATTTTTTAAAAAGAGGTGAGGCGGTATCTTCTCCAGTCAGTCATG<br>AAAAAAAAAA                                      | 49 | handle A10 35           |
| 25[98]  | 27[118] | GATTATACAAAGAAGTTATATAACTATATGTAATAATCATTTGATTTA<br>AAAAAAAAAA                                     | 49 | handle A10 36           |
| 8[199]  | 8[198]  | ATATCAATGAAATAGCAATAGCTAGATAGCCCCGAGCGCTA tt<br>TAGCAGCATCACAGATCACA GTATAAAAC CATGACTACCTATCCTACA |    | Design 1<br>inverted a  |
| 15[210] | 15[199] | ATCAATACCGTTCTAGCTGAAAAACATTACAG tt TGTAGGATAGGTAGTCATG<br>GTTTTATAC TGTGATCTGTGATGCTGCTA          |    | Design 1<br>inverted b  |
|         |         |                                                                                                    |    |                         |
| 8[199]  | 8[198]  | ATATCAATGAAATAGCAATAGCTAGATAGCCCCGAGCGCTA tt<br>TAGCAGCATCACAGATCACA CTATAAAAG CATGACTACCTATCCTACA |    | Design 1<br>consensus a |
| 15[210] | 15[199] | ATCAATACCGTTCTAGCTGAAAAACATTACAG tt TGTAGGATAGGTAGTCATG<br>CTTTTATAG TGTGATCTGTGATGCTGCTA          |    | Design 1<br>consensus b |
|         |         |                                                                                                    |    |                         |
| 8[199]  | 8[198]  | ATATCAATGAAATAGCAATAGCTAGATAGCCCCGAGCGCTA tt<br>TAGCAGCATCACAGATCACA ACTTCTCGG CATGACTACCTATCCTACA |    | Design 1<br>scramble a  |
| 15[210] | 15[199] | ATCAATACCGTTCTAGCTGAAAAACATTACAG tt TGTAGGATAGGTAGTCATG<br>CCGAGAAGT TGTGATCTGTGATGCTGCTA          |    | Design 1<br>scramble b  |
|         |         |                                                                                                    |    |                         |

|         |        |                                                                                                                                           |  |            |
|---------|--------|-------------------------------------------------------------------------------------------------------------------------------------------|--|------------|
| 15[210] | 8[200] | ATCAATACCGTTCTAGCTGAAAAACATTACAG tt TAGCAGCATCACAGATCACA<br>GTATAAAAC CATGACTACCTATCCTACA tt<br>ATATCAATGAAATAGCAATAGCTAGATAGCCCCGAGCGCTA |  | Design 2 a |
|         |        | TGTAGGATAGGTAGTCATG GTTTTATAC TGTGATCTGTGATGCTGCTA                                                                                        |  | Design 2 b |

**Supplementary Table S2: Summary of the angular distribution in various designs and experimental conditions.**

| Bridge design and sequence       | Experimental conditions                                                   | Peak position in Histogram | The yield of devices (rounded off) |
|----------------------------------|---------------------------------------------------------------------------|----------------------------|------------------------------------|
| <b>Design 1 with S1 sequence</b> | Concentration optimization of bridging staples                            | 80±5°                      | ~25%                               |
|                                  | • 2-fold excess                                                           |                            | ~40%                               |
|                                  | • 4-fold excess                                                           |                            | ~37%                               |
|                                  | • 6-fold excess                                                           |                            | ~35%                               |
|                                  | • 8-fold excess                                                           |                            | ~31%                               |
| <b>Design 2 with S1 sequence</b> | Concentration optimization of bridging staples                            | 80±5°                      | ~31%                               |
|                                  | • 2-fold excess                                                           |                            | ~37%                               |
|                                  | • 4-fold excess                                                           |                            | ~39%                               |
|                                  | • 6-fold excess                                                           |                            | ~41%                               |
|                                  | • 8-fold excess                                                           |                            | ~39%                               |
| <b>Open Devices</b>              | Devices with undefined angle                                              | Flat distribution          | NA                                 |
| <b>Design 1 with S1 sequence</b> | Increasing concentrations of TBP                                          |                            |                                    |
|                                  | • 25 nM TBP                                                               | 80±5°                      | ~23%                               |
|                                  |                                                                           | 65±5°                      | ~36%                               |
|                                  | • 50 nM TBP                                                               | 80±5°                      | ~21%                               |
|                                  |                                                                           | 65±5°                      | ~39%                               |
|                                  | • 100 nM TBP                                                              | 80±5°                      | ~21%                               |
|                                  |                                                                           | 65±5°                      | ~40%                               |
|                                  | • 150 nM TBP                                                              | 80±5°                      | ~24%                               |
|                                  |                                                                           | 65±5°                      | ~39%                               |
|                                  | Increasing concentration of TBP + TFIIA                                   |                            |                                    |
|                                  | • 25 nM TBP + 25 nM TFIIA                                                 | 80±5°                      | ~24%                               |
|                                  |                                                                           | 55±5°                      | ~34%                               |
|                                  | • 50 nM TBP + 50 nM TFIIA                                                 | 80±5°                      | ~23%                               |
|                                  |                                                                           | 55±5°                      | ~36%                               |
|                                  | • 100 nM TBP + 100 nM TFIIA                                               | 80±5°                      | ~16%                               |
|                                  |                                                                           | 55±5°                      | ~41%                               |
|                                  | Constant TBP concentration (50 nM) and increasing concentrations of TFIIA |                            |                                    |
|                                  | • 50 nM TBP + 0 nM TFIIA                                                  | 80±5°                      | ~21%                               |
|                                  |                                                                           | 65±5°                      | ~39%                               |
|                                  | • 50 nM TBP + 25 nM TFIIA                                                 | 80±5°                      | ~23%                               |
|                                  | No second peak                                                            | NA                         |                                    |
| • 50 nM TBP + 50 nM TFIIA        | 80±5°                                                                     | ~24%                       |                                    |
|                                  | 55±5°                                                                     | ~34%                       |                                    |
| • 50 nM TBP + 100 nM TFIIA       | 80±5°                                                                     | ~19%                       |                                    |
|                                  | 55±5°                                                                     | ~36%                       |                                    |

|                                  |                                                          |       |      |
|----------------------------------|----------------------------------------------------------|-------|------|
|                                  | Increasing concentration of TBP + TFIIB                  |       |      |
|                                  | • 25 nM TBP + 25 nM TFIIB                                | 80±5° | ~23% |
|                                  |                                                          | 65±5° | ~29% |
|                                  | • 50 nM TBP + 50 nM TFIIB                                | 80±5° | ~22% |
|                                  |                                                          | 65±5° | ~38% |
|                                  | • 100 nM TBP + 100 nM TFIIB                              | 80±5° | ~18% |
|                                  |                                                          | 65±5° | ~40% |
|                                  | Increasing concentration of TBP + TFIIA+ TFIIB           |       |      |
|                                  | • 25 nM TBP + 25 nM TFIIA + 25 nM TFIIB                  | 80±5° | ~23% |
|                                  |                                                          | 55±5° | ~27% |
|                                  | • 50 nM TBP + 50 nM TFIIA + 50 nM TFIIB                  | 80±5° | ~24% |
|                                  |                                                          | 55±5° | ~31% |
|                                  | • 100 nM TBP + 100 nM TFIIA + 100 nM TFIIB               | 80±5° | ~20% |
|                                  |                                                          | 55±5° | ~37% |
|                                  | Control experiments                                      |       |      |
| • 50 nM TFIIA                    | 80±5°                                                    | ~43%  |      |
| • 50 nM TFIIB                    | 80±5°                                                    | ~38%  |      |
| <b>Design 1 with S2 sequence</b> | Increasing concentrations of TBP                         |       |      |
|                                  | • 25 nM TBP                                              | 80±5° | ~28% |
|                                  |                                                          | 65±5° | ~25% |
|                                  | • 50 nM TBP                                              | 80±5° | ~27% |
|                                  |                                                          | 65±5° | ~30% |
|                                  | • 100 nM TBP                                             | 80±5° | ~24% |
|                                  |                                                          | 65±5° | ~31% |
|                                  | Increasing concentration of TBP + TFIIA                  |       |      |
|                                  | • 25 nM TBP + 25 nM TFIIA                                | 80±5° | ~23% |
|                                  |                                                          | 55±5° | ~33% |
|                                  | • 50 nM TBP + 50 nM TFIIA                                | 80±5° | ~22% |
| 55±5°                            |                                                          | ~37%  |      |
| • 100 nM TBP + 100 nM TFIIA      | 80±5°                                                    | ~19%  |      |
|                                  | 55±5°                                                    | ~39%  |      |
| <b>Design 1 with S3 sequence</b> | Control devices forming an 80° angle between the bundles | 80±5° | ~41% |
|                                  | Control devices incubated with                           |       |      |
|                                  | • 50 nM TBP                                              | 80±5° | ~40% |
|                                  | • 50 nM TBP + 50 nM TFIIA                                | 80±5° | ~41% |
|                                  | • 50 nM TBP + 50 nM TFIIB                                | 80±5° | ~39% |

## References

- 1 J. L. Kim, D. B. Nikolov and S. K. Burley, *Nature*, 1993, 365, 520–527.
- 2 Y. Kim, J. H. Geiger, S. Hahn and P. B. Sigler, *Nature*, 1993, 365, 512–520.
- 3 P. F. Kosa, G. Ghosh, B. S. DeDecker and P. B. Sigler, *PNAS*, 1997, 94, 6042–6047.
